# Supplementary material
Source: MDPI journal article supplement (https://www.mdpi.com/2218-0532/92/2/24)
Supplement: s1 [file s1]

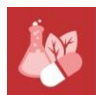

# Quantitative $^1\text{H}$ NMR Spectroscopy Method for Determination of Anthraquinone Derivatives in Extracts from *Rubia tinctorum* L. Roots and Rhizomes

Vasilii Vasil'ev \*, Anzhelika Sheremeta , Vasilii Ivlev , Sergey Goriainov , Fadi Hajjar , Cesar Esparza, Evgeniy Platonov, Arkadiy Khromov, Alexandr Kolesnov , Victoria Romashchenko and Gennady Kalabin

RERC Pharmacy, Peoples' Friendship University of Russia (RUDN University), 6 Miklukho-Maklaya Street, Moscow 117198, Russia; goryainovs@list.ru (S.G.); phfadyhajj@gmail.com (F.H.); arkadiy18@yandex.ru (A.K.)  
\* Correspondence: vasyavasilyev@mail.ru

## Supplementary Material A

$^1\text{H}$  NMR spectral parameters of ruberythric acid, lucidin-3-primeveroside, alizarin, purpurin, lucidin internal standards

Ruberythric acid.  $^1\text{H}$  NMR (600 MHz, DMSO- $\text{D}_6$ ,  $\delta$ , ppm): 12.66 (s, 1H, OH-1), 8.27 – 8.24 (m, 1H, arom. H), 8.21 – 8.18 (m, 1H, arom. H), 7.97 – 7.92 (m, 2H, arom. H), 7.74 (d,  $J$  = 8.5 Hz, 1H, arom. H), 7.62 (d,  $J$  = 8.5 Hz, 1H, arom. H), 5.51 (d,  $J$  = 5.3 Hz, 1H, OH-3'), 5.28 – 5.23 (m, 2H, OH-4', 5'), 5.07 (d, 1H,  $J$  = 7.6 Hz, anomeric H-2' glucose), 4.98 (d,  $J$  = 4.6 Hz, 2H, OH-4'', 5''), 4.14 (d,  $J$  = 7.6 Hz, 1H, anomeric H-2'' xylose).

Lucidin-3-primeveroside.  $^1\text{H}$  NMR (600 MHz, DMSO- $\text{D}_6$ ,  $\delta$ , ppm)  $\delta$  13.04 (s, 1H, OH- 1), 8.26 – 8.24 (m, 1H, arom. H), 8.20 – 8.18 (m, 1H, arom. H), 7.98 – 7.92 (m, 2H, arom. H), 7.48 (s, 1H, H-4), 5.12 (d,  $J$  = 7.3 Hz, 1H, anomeric H-2' glucose), 4.66 (d,  $J$  = 11.4 Hz, 1H, -CH<sub>2</sub>-), 4.58 (d,  $J$  = 11.4 Hz, 1H, -CH<sub>2</sub>-), 4.14 (d,  $J$  = 7.4 Hz, 1H, anomeric H-2'' xylose).

Alizarin.  $^1\text{H}$  NMR (600 MHz, DMSO- $\text{D}_6$ , ppm)  $\delta$  12.62 (s, 1H, OH-1), 10.88 (s, 1H, OH- 2), 8.25 – 8.23 (m, 1H, arom. H), 8.19 – 8.17 (m, 1H, arom. H), 7.96 – 7.90 (m, 2H, arom. H), 7.67 (d,  $J$  = 8.4 Hz, 1H, arom. H), 7.24 (d,  $J$  = 8.3 Hz, 1H, arom. H).

Purpurin.  $^1\text{H}$  NMR (600 MHz, DMSO- $\text{D}_6$ , ppm)  $\delta$  13.40 (s, 1H, OH-1), 13.12 (s, 1H, OH-4), 8.28 – 8.22 (m, 3H, arom. H), 8.01 – 7.89 (m, 3H, arom. H), 6.70 (s, 1H, arom. H).

Lucidin.  $^1\text{H}$  NMR (600 MHz, DMSO- $\text{D}_6$ , ppm)  $\delta$  13.19 (s, 1H, OH-1), 8.21 (dd,  $J$  = 7.5, 1.5 Hz, 1H, arom. H), 8.15 (dd,  $J$  = 7.4, 1.6 Hz, 1H, arom. H), 7.91 (dq,  $J$  = 14.6, 7.3, 1.4 Hz, 2H, arom. H), 7.25 (s, 1H, arom. H), 4.54 (s, 2H, -CH<sub>2</sub>-).

## Supplementary Material B

**Table S1.** RA and LP content in the untreated sample and the samples either heated at 60 °C for 15 min or exposed to the ultrasound for 30 min.

| Sample                        | C (RA), % | C (LP), % | C (total), % |
|-------------------------------|-----------|-----------|--------------|
| Normal conditions             | 1,72±0,02 | 2,07±0,03 | 3,79±0,04    |
| Heating (60 °C)               | 1,74±0,03 | 2,10±0,04 | 3,84±0,03    |
| Ultrasonic treatment (30 min) | 1,86±0,02 | 2,15±0,3  | 4,01±0,04    |

**Table S2.** RA and LP and their total content after the ultrasound treatment for 0, 15, 30, 45, and 60 minutes.

| Ultrasonic treatment, min | C (RA), %   | C (LP), %   | C (total), % |
|---------------------------|-------------|-------------|--------------|
| 0                         | 1,53 ± 0,03 | 2,09 ± 0,03 | 3,63 ± 0,03  |

|    |                 |                 |                 |
|----|-----------------|-----------------|-----------------|
| 15 | $1,57 \pm 0,02$ | $2,13 \pm 0,02$ | $3,70 \pm 0,02$ |
| 30 | $1,68 \pm 0,03$ | $2,17 \pm 0,03$ | $3,86 \pm 0,03$ |
| 45 | $1,68 \pm 0,02$ | $2,17 \pm 0,02$ | $3,85 \pm 0,02$ |
| 60 | $1,68 \pm 0,03$ | $2,18 \pm 0,03$ | $3,86 \pm 0,03$ |

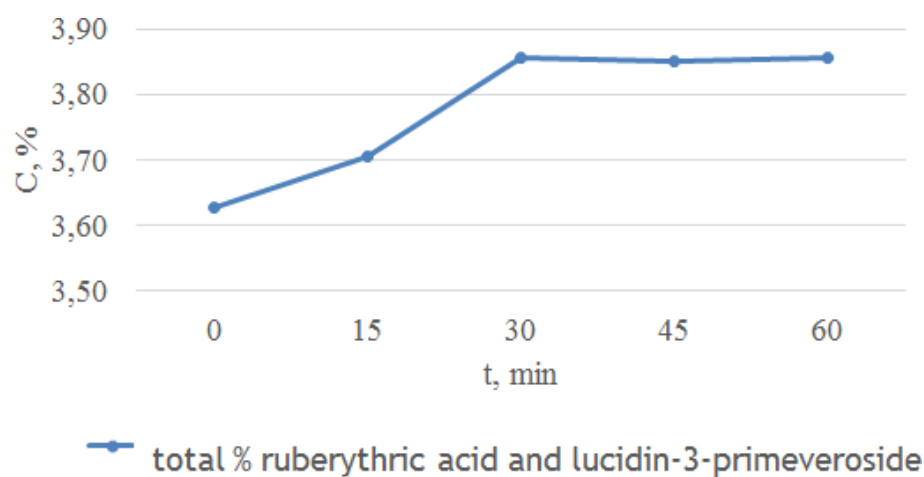

**Figure S1.** The dependence of the concentration of ruberythric acid and lucidin-3-primeveroside on ultrasound exposure time.

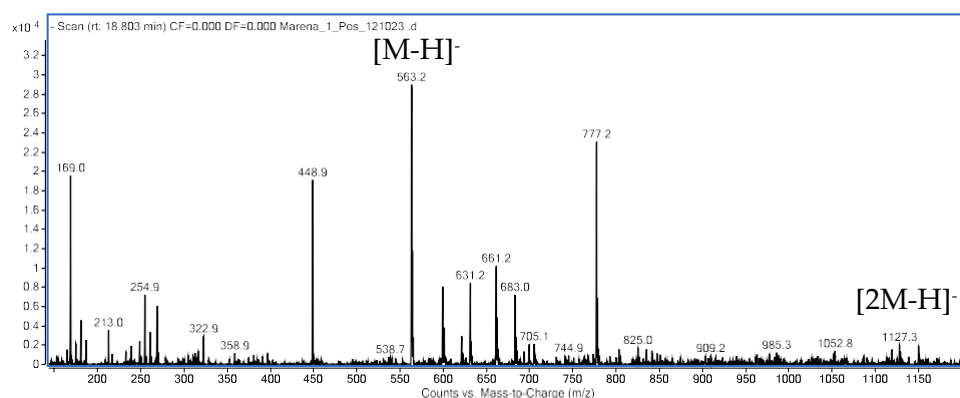

**Figure S2.** ESI (-) Mass spectrum of LP in the extract from the *Rubia tinctorum* L. roots and rhizomes.

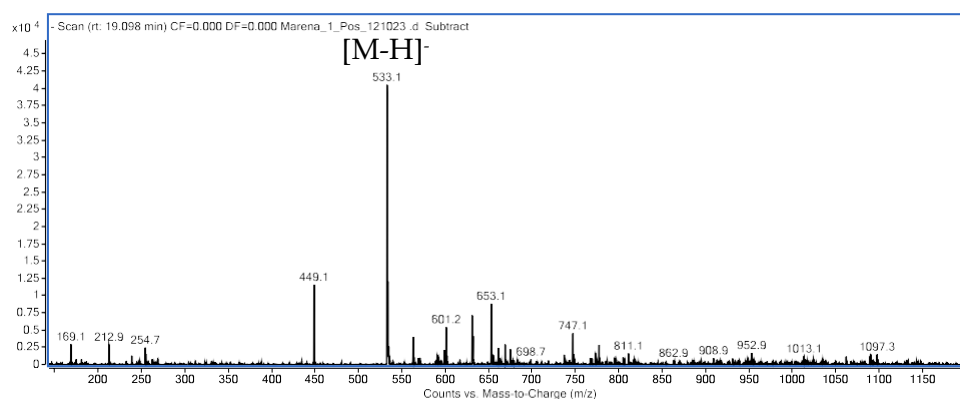

**Figure S3.** ESI (-) Mass spectrum of ruberythric acid in the extract from the *Rubia tinctorum* L. of roots and rhizomes, registration of negative ions.

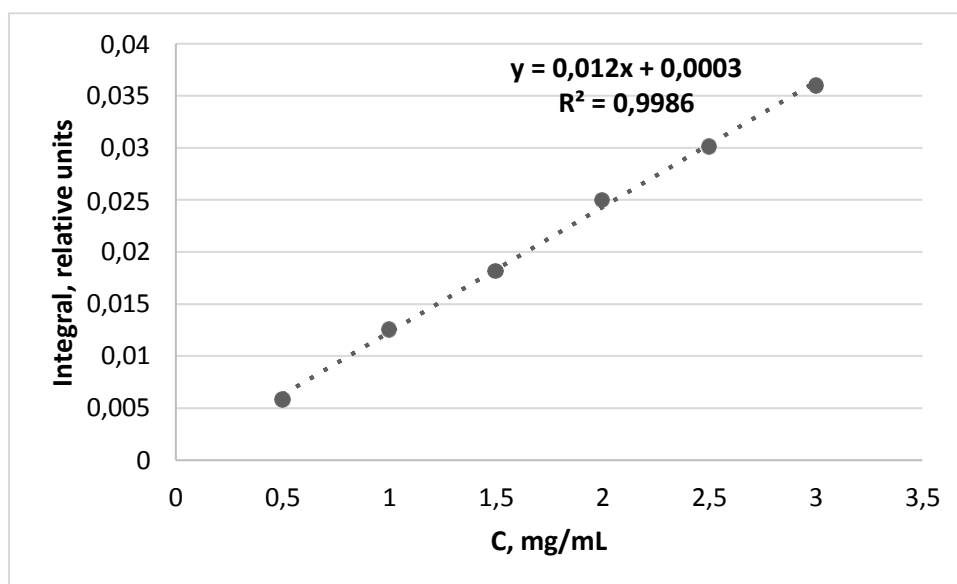

Figure S4. Linear dependence of lucedin-3-primeveroside proton signal integral on concentration.

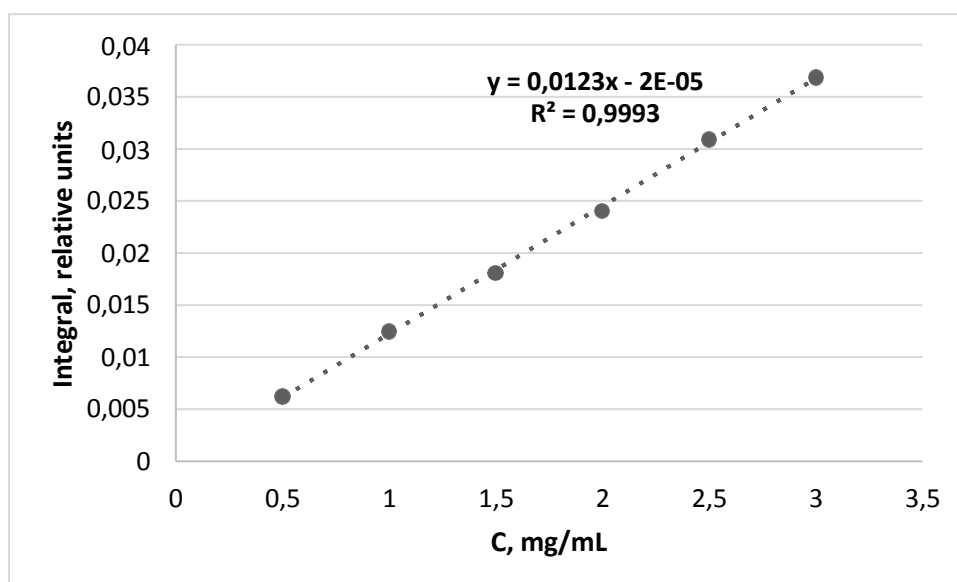

Figure S5. Linear dependence of ruberythric acid proton signal integral on concentration.
